# Supplementary material for: The Synthesis, Characterization, and Fluxional Behavior of a Hydridorhodatetraborane
Source: MDPI journal article supplement (doi:10.3390/molecules28186462), 2023-09-06
Supplement: s1 [file s1]

# The Synthesis, Characterization, and Fluxional Behavior of a Hydridorhodatetaborane

Fatou Diaw-Ndiaye, Pablo J. Sanz Miguel, Ricardo Rodríguez and Ramón Macías

Departamento de Química Inorgánica, Instituto de Síntesis Química y Catálisis Homogénea (ISQCH), Universidad de Zaragoza-CSIC, 50009 Zaragoza, Spain

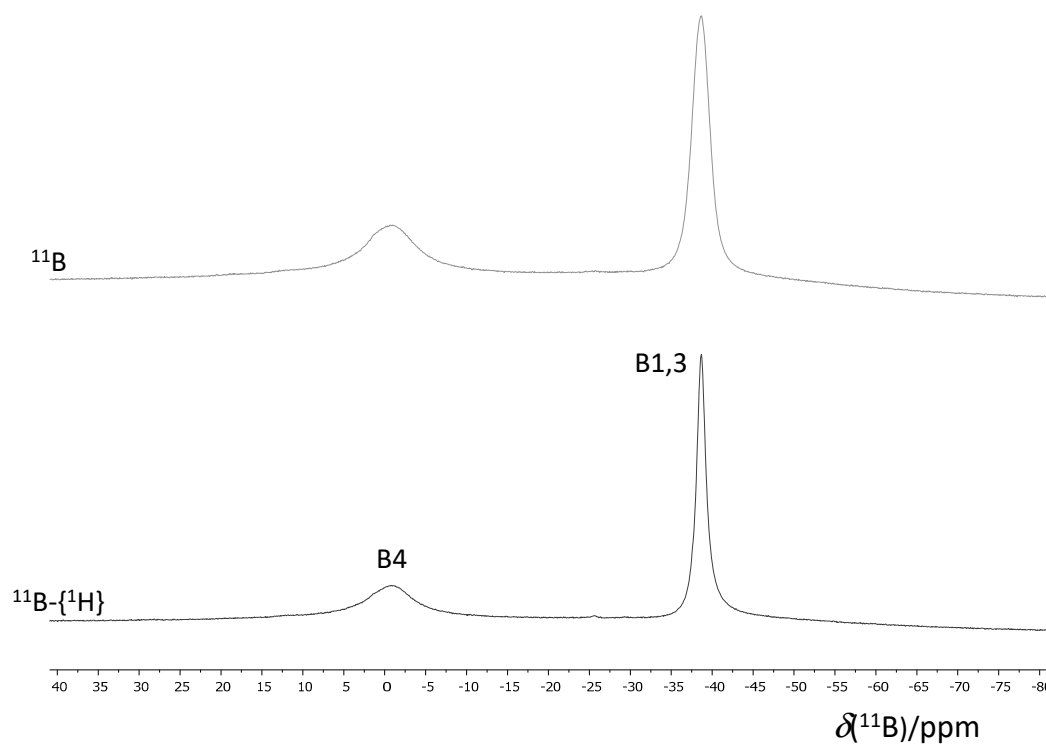

**Figure S1**  $^{11}\text{B}\{-^1\text{H}\}$  and  $^{11}\text{B}$  NMR spectra of **1** in  $\text{CD}_2\text{Cl}_2$ , at 298 K, 96 MHz.

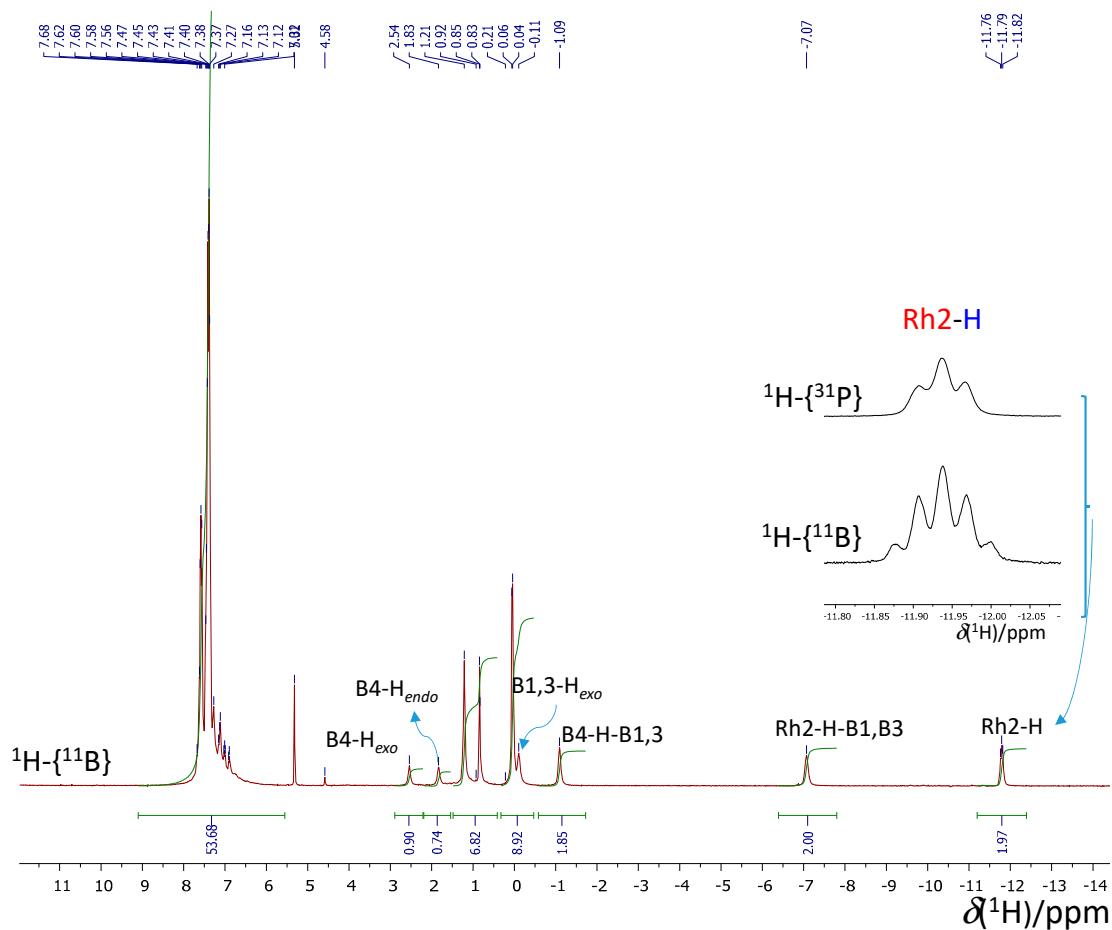

**Figure S2** 500 MHz,  $^1\text{H}\{-^{11}\text{B}\}$  NMR spectrum (red trace) at 223 K, in  $\text{CD}_2\text{Cl}_2$ ; and inlet showing the Rh2–H signal upon boron-11 and phosphorous-31 decoupling.

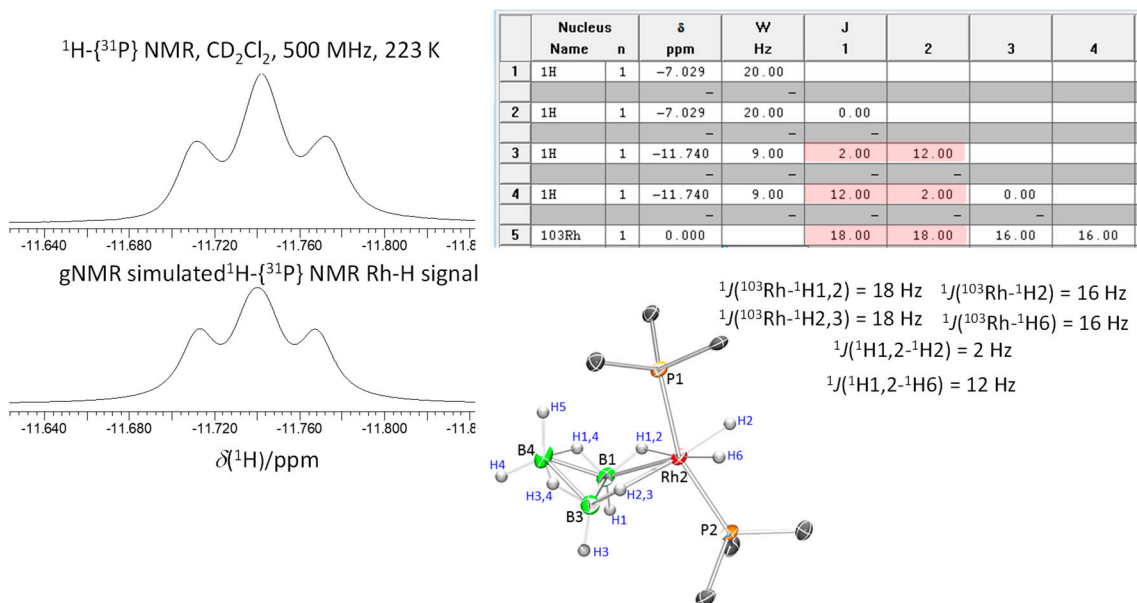

**Figure S3** Simulation of the Rh2–H hydride signal in the  $^1\text{H}\{-^{31}\text{P}\}$  spectrum of  $[\text{Rh}(\text{C}_2\text{B}_3\text{H}_8)(\text{H})_2(\text{PPh}_3)_2]$  (**1**), in  $\text{CD}_2\text{Cl}_2$ .

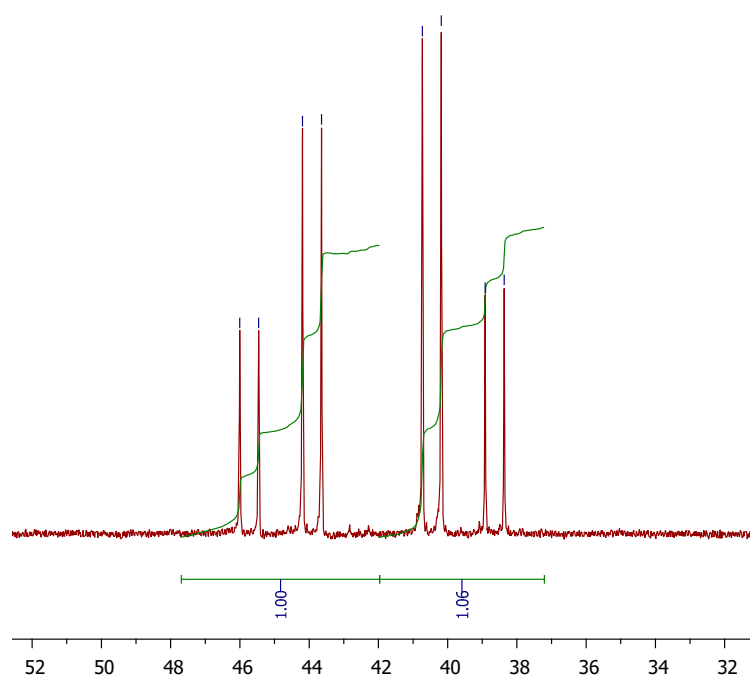

**Figure S4**  $^{31}\text{P}\{-^1\text{H}\}$  NMR spectra of  $[\text{Rh}(\text{}^2\text{-B}_3\text{H}_8)(\text{H})_2(\text{PPh}_3)_2]$  (**1**), in  $\text{CD}_2\text{Cl}_2$ , at 223 K.

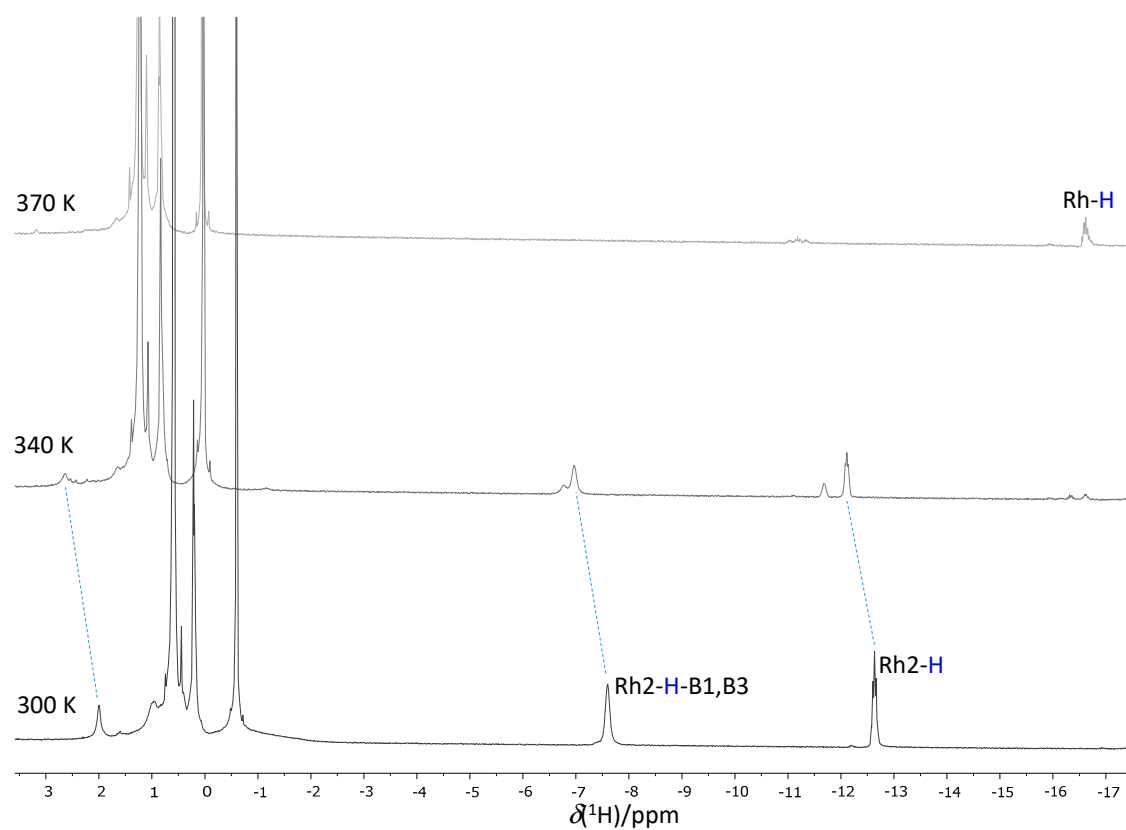

**Figure S5**  $^1\text{H}\{-^{11}\text{B}\}$  NMR spectra of  $[\text{Rh}(\text{}^2\text{-B}_3\text{H}_8)(\text{H})_2(\text{PPh}_3)_2]$  (**1**), in  $\text{Cl}_2\text{DC-CDCl}_2$ , as function of the temperature.

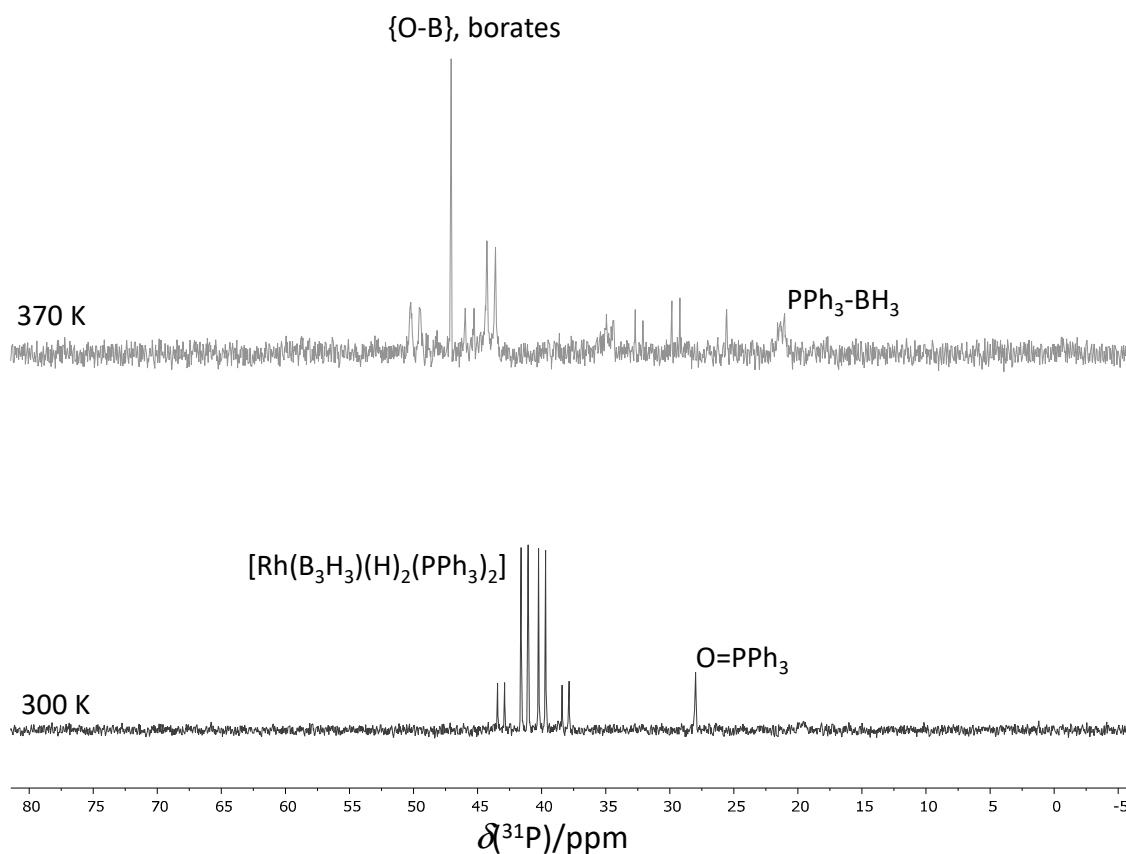

**Figure S6**  $^{31}\text{P}\{-^1\text{H}\}$  NMR spectra of  $[\text{Rh}(\text{}^2\text{-B}_3\text{H}_8)(\text{H})_2(\text{PPh}_3)_2]$  (1), in  $\text{Cl}_2\text{DC}-\text{CDCl}_2$ , as function of the temperature:

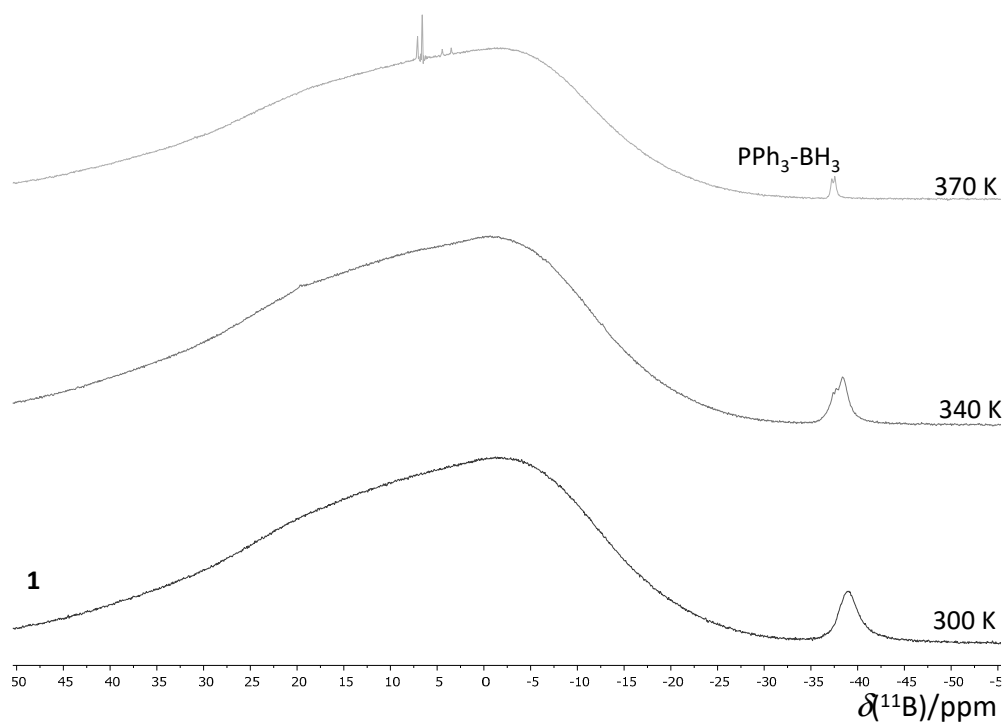

**Figure S7**  $^{11}\text{B}\{-^1\text{H}\}$  NMR spectra of  $[\text{Rh}(\text{}^2\text{-B}_3\text{H}_8)(\text{H})_2(\text{PPh}_3)_2]$  (1), in  $\text{Cl}_2\text{DC}-\text{CDCl}_2$ , as function of the temperature: decomposition to give borates and the *tris*-phenylphosphine adduct.

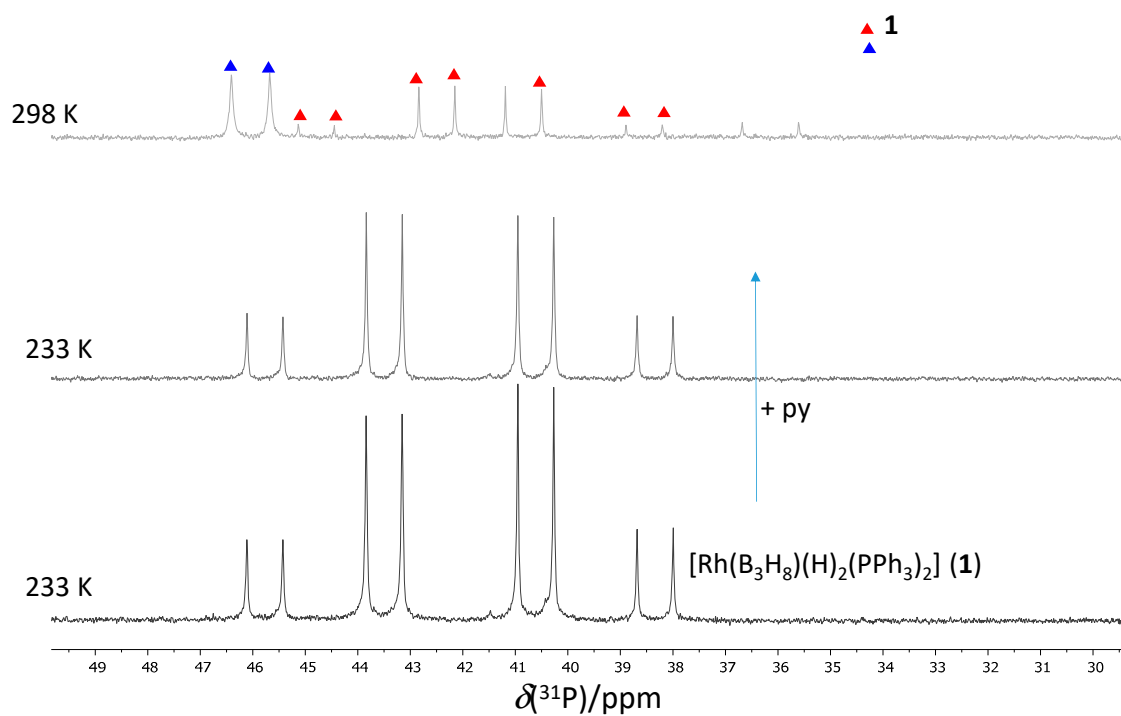

**Figure S8**  $^{31}\text{P}\{-^1\text{H}\}$  NMR spectra from the reaction between  $[\text{Rh}(\text{B}_3\text{H}_8)(\text{H})_2(\text{PPh}_3)_2] \text{ (1)}$  and pyridine, in dichloromethane.

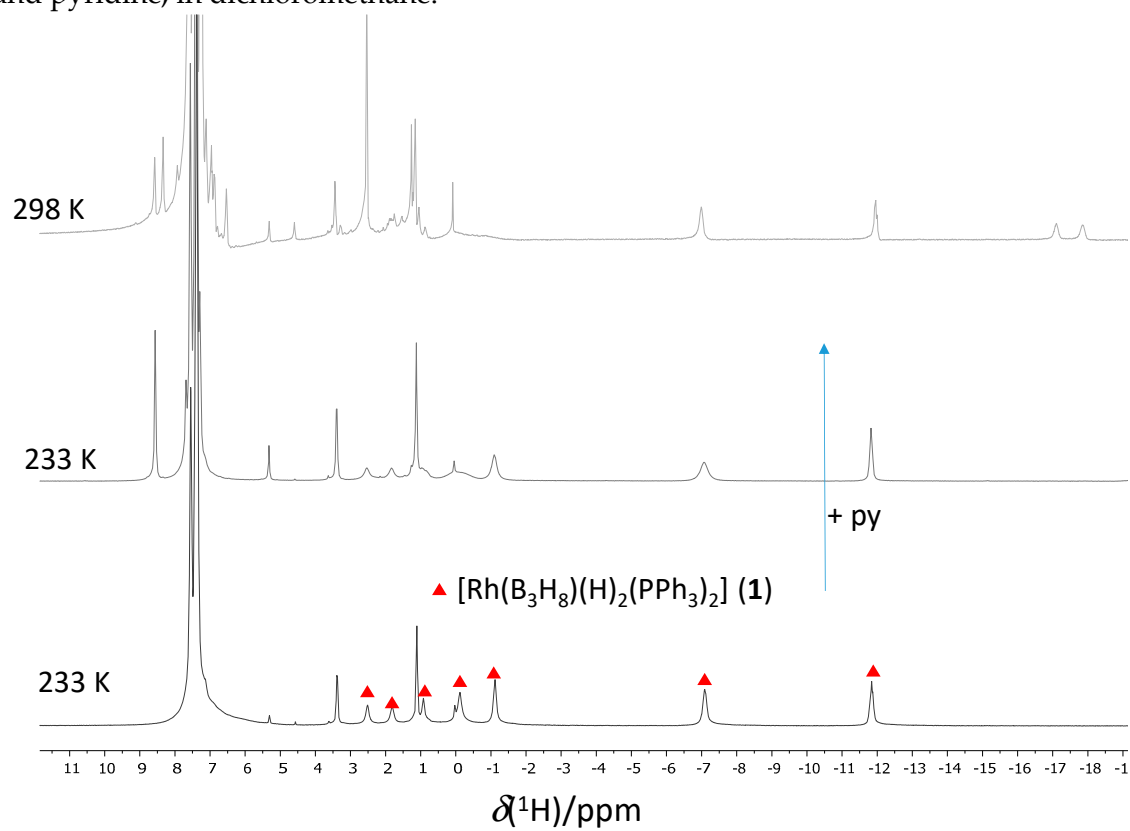

**Figure S9**  $^1\text{H}\{-^{11}\text{B}\}$  NMR spectra from the reaction between  $[\text{Rh}(\text{B}_3\text{H}_8)(\text{H})_2(\text{PPh}_3)_2] \text{ (1)}$  and pyridine, in dichloromethane.

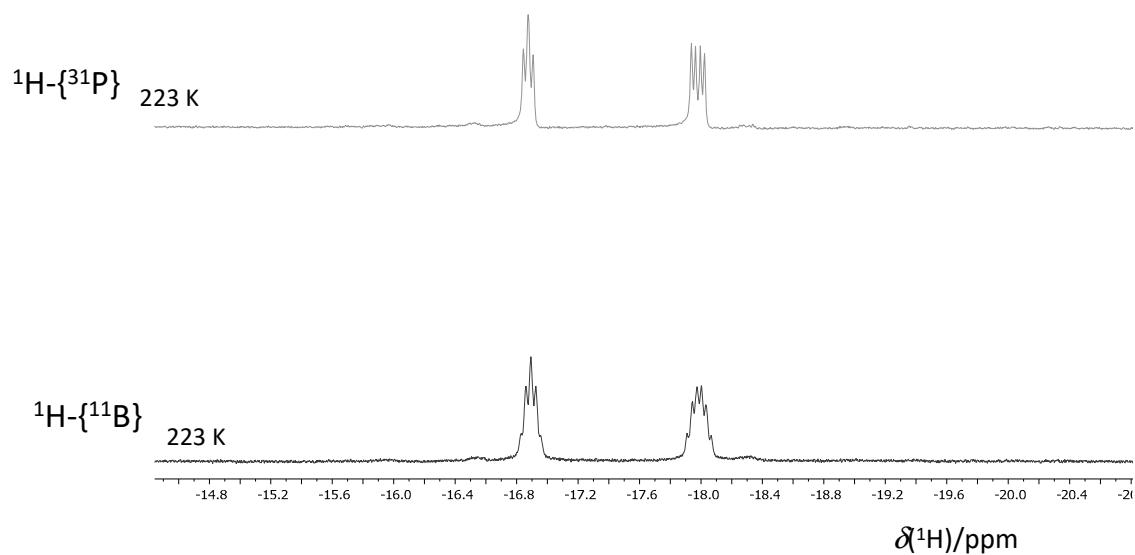

**Figure S10** Proton NMR spectra signals from the reaction between  $[\text{Rh}(\text{B}_3\text{H}_8)(\text{H})_2(\text{PPh}_3)_2]$  (**1**) and pyridine, in dichloromethane.

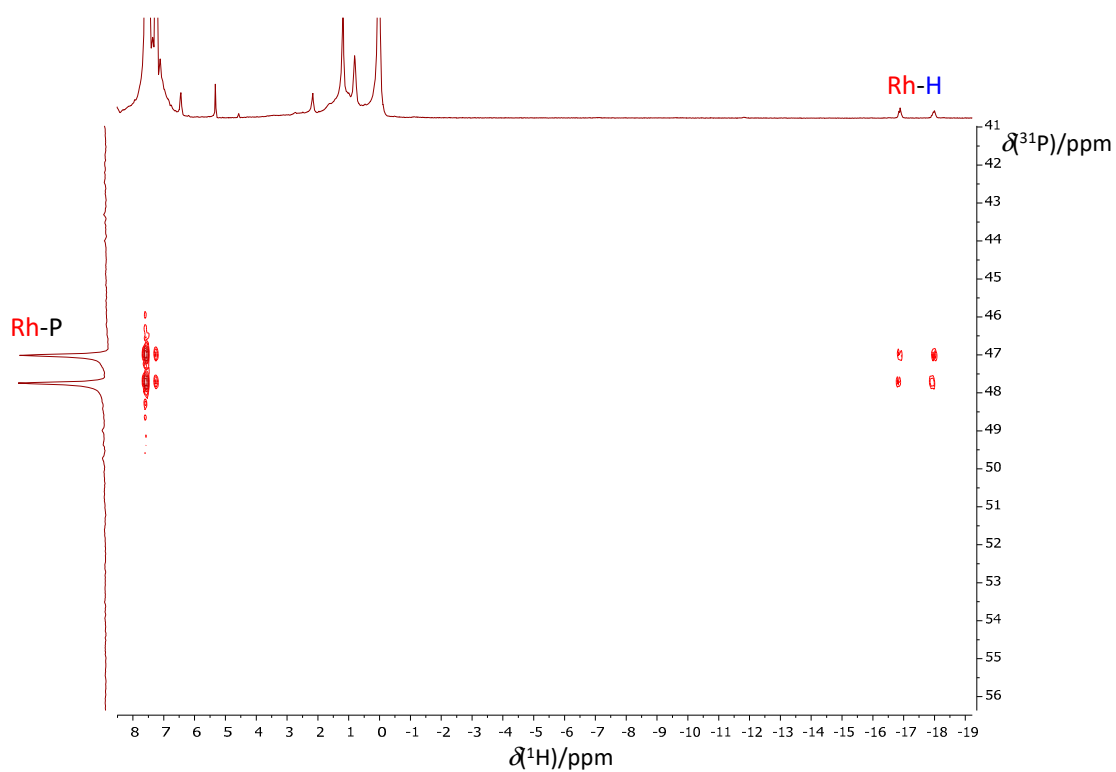

**Figure S11**  $^{31}\text{P}\text{-}^1\text{H}$ -HMBC NMR spectrum from the reaction between  $[\text{Rh}(\text{B}_3\text{H}_8)(\text{H})_2(\text{PPh}_3)_2]$  (**1**) and pyridine, in dichloromethane.

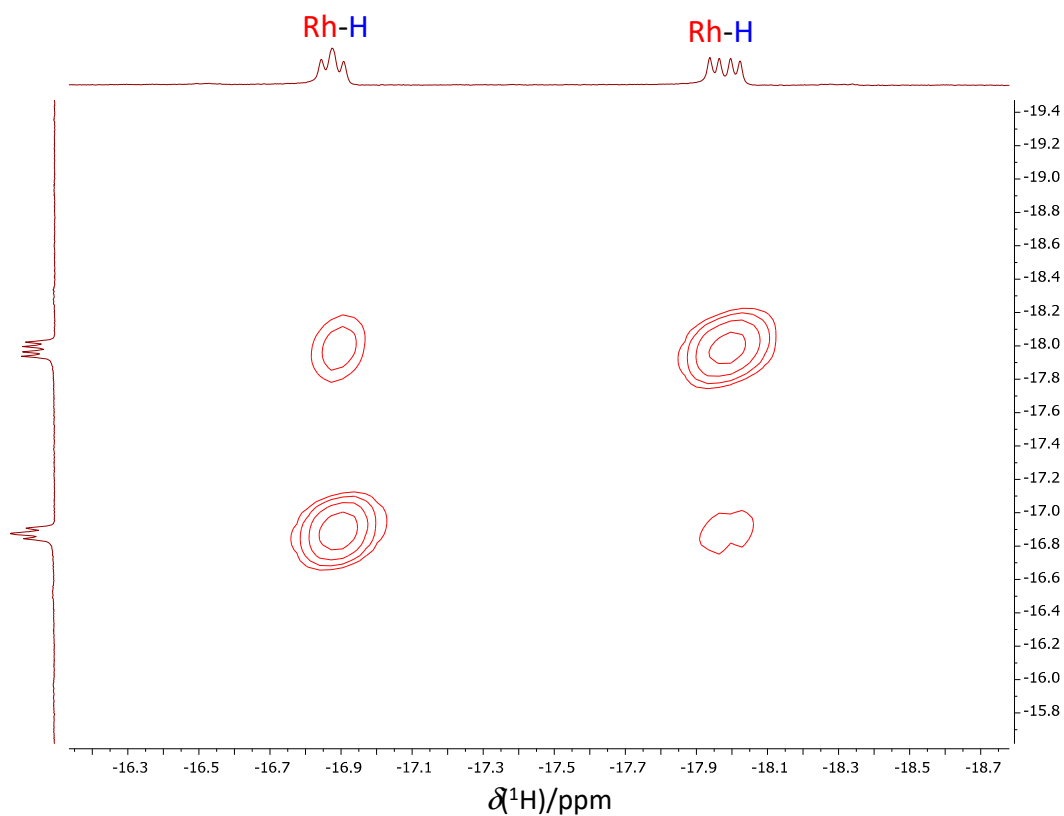

**Figure S12**  $^1\text{H}$ - $^1\text{H}$ -COSY NMR spectrum, in the hydride region, from the reaction between  $[\text{Rh}(\text{-}^2\text{B}_3\text{H}_8)(\text{H})_2(\text{PPh}_3)_2]$  (**1**) and pyridine, in dichloromethane.

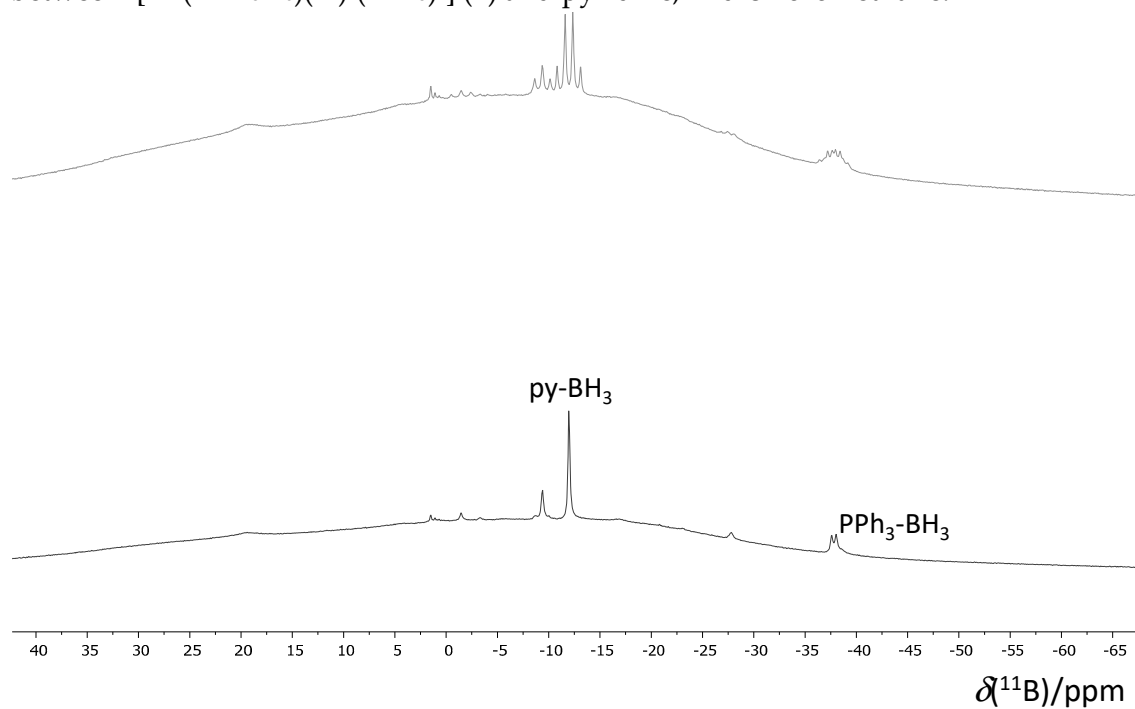

**Figure S13**  $^{11}\text{B}$ - $\{^1\text{H}\}$  NMR spectra from the reaction between  $[\text{Rh}(\text{-}^2\text{B}_3\text{H}_8)(\text{H})_2(\text{PPh}_3)_2]$  (**1**) and pyridine, in dichloromethane.

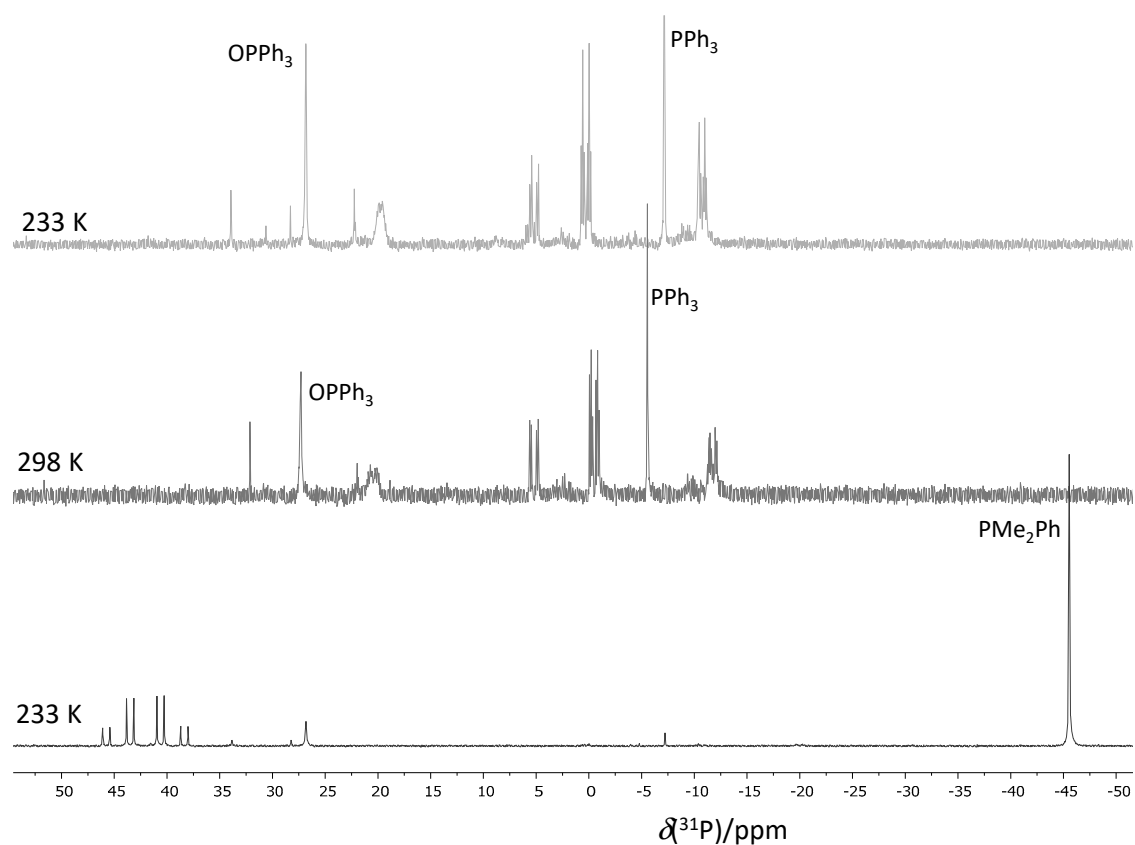

**Figure S14**  $^{31}\text{P}\{-^1\text{H}\}$  NMR spectra that correspond to the reaction between  $[\text{Rh}(\text{B}_3\text{H}_8)(\text{H})_2(\text{PPh}_3)_2]$  (**1**) and  $\text{PMe}_2\text{Ph}$ : upon addition of  $\text{PMe}_2\text{Ph}$  at 233 K (bottom); after increasing the reaction mixture temperature at 298 K; and at 233 K, in dichloromethane.

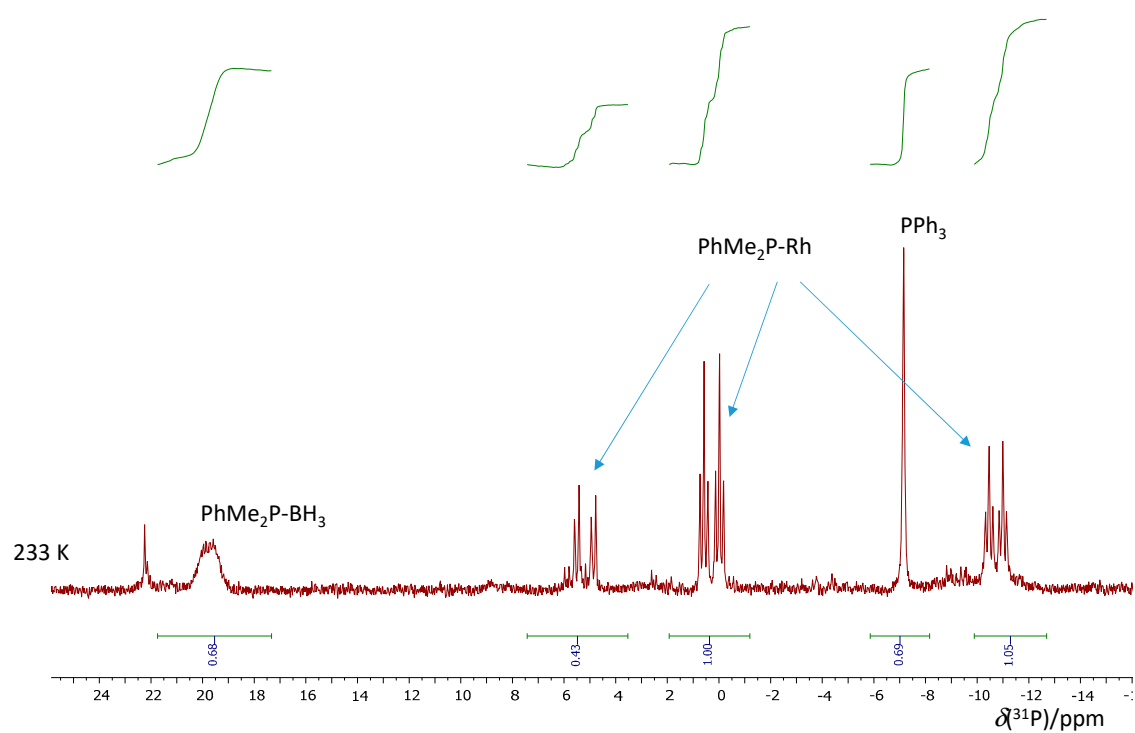



**Figure S15**  $^{31}\text{P}\{-^1\text{H}\}$  NMR spectrum from the reaction between  $[\text{Rh}(\text{-}^2\text{-B}_3\text{H}_8)(\text{H})_2(\text{PPh}_3)_2]$  (**1**) and  $\text{PMe}_2\text{Ph}$ , at 233 K, in dichloromethane (upper spectrum in Figure S14).

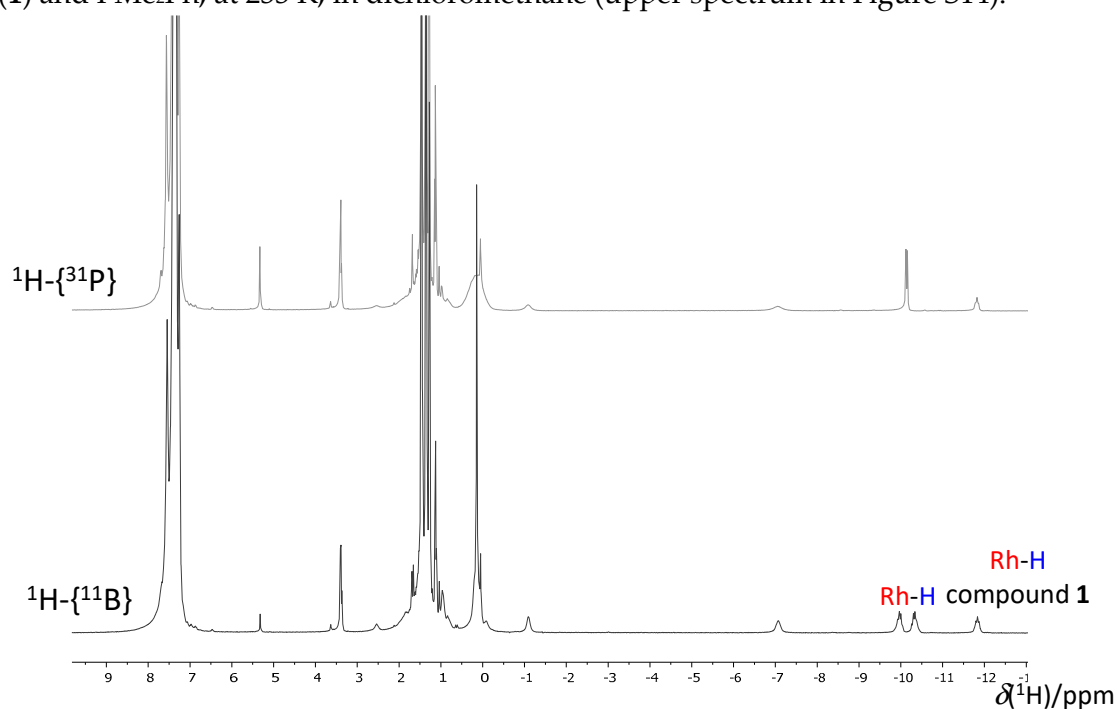

**Figure S16** Proton NMR spectra from the reaction between  $[\text{Rh}(\text{-}^2\text{-B}_3\text{H}_8)(\text{H})_2(\text{PPh}_3)_2]$  (**1**) and  $\text{PMe}_2\text{Ph}$ , at 233 K, in dichloromethane.

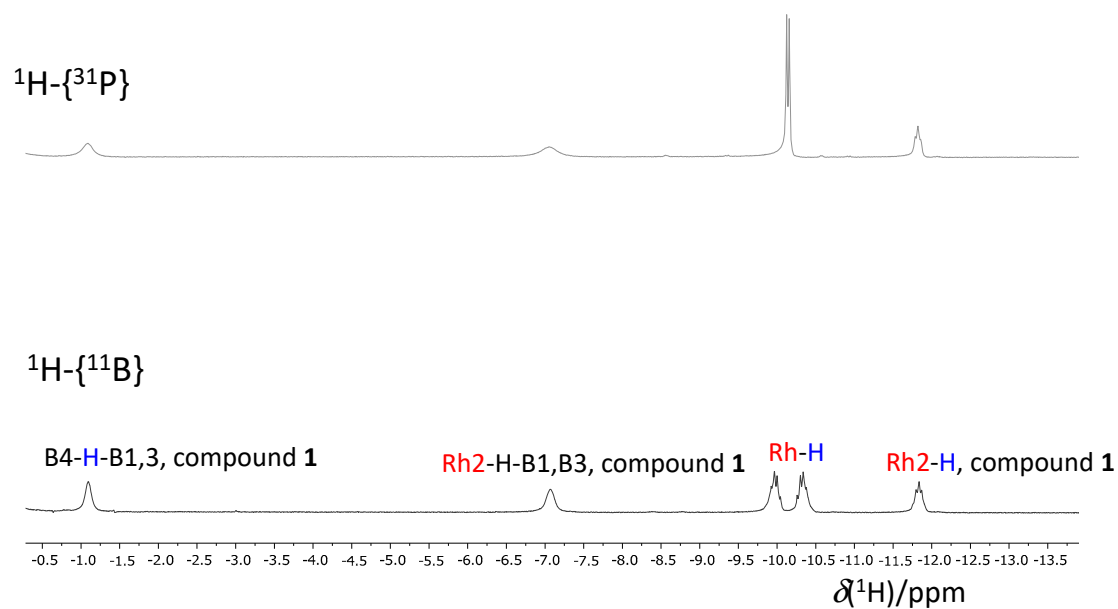

**Figure S17** Proton NMR spectra from the reaction between  $[\text{Rh}(\text{-}^2\text{-B}_3\text{H}_8)(\text{H})_2(\text{PPh}_3)_2]$  (**1**) and  $\text{PMe}_2\text{Ph}$ , at 233 K, in the negative region (full spectra in Figure S16).

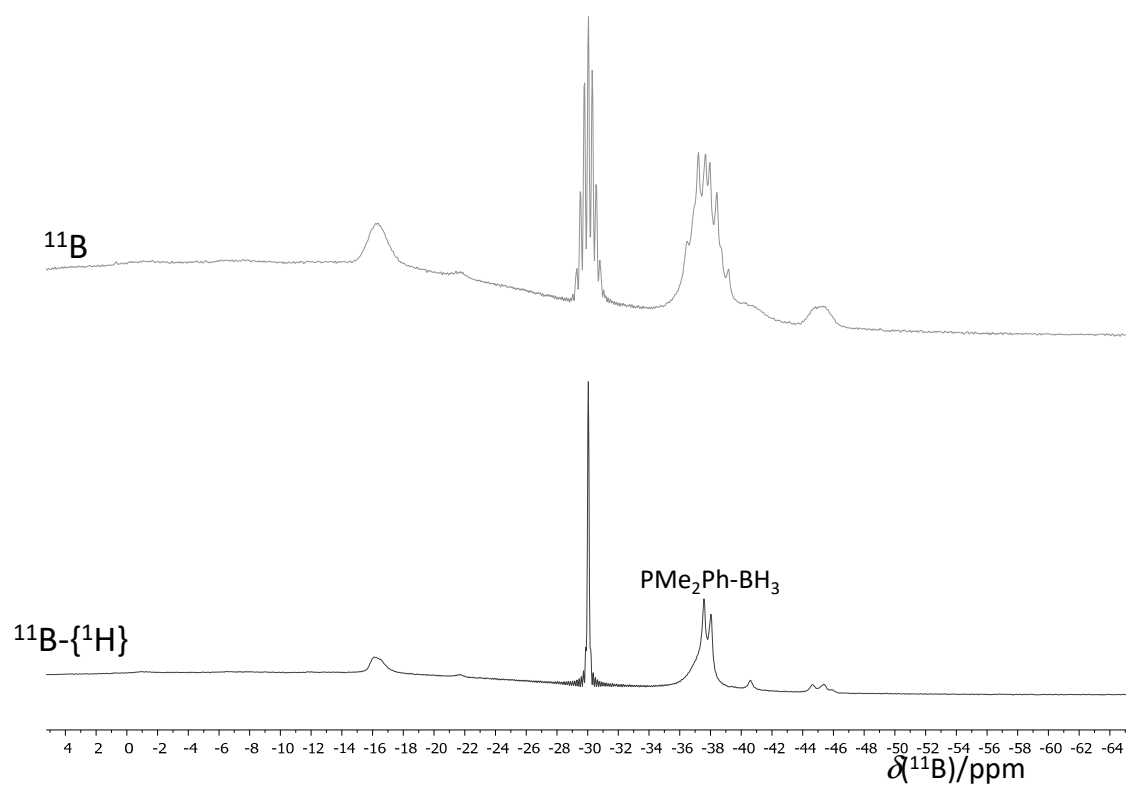

**Figure S18** Boron-11 NMR spectra from the reaction between  $[\text{Rh}(\text{-}^2\text{-B}_3\text{H}_8)(\text{H})_2(\text{PPh}_3)_2]$  (1) and  $\text{PMe}_2\text{Ph}$ , at 29 K, in dichloromethane- $\text{d}_2$ .

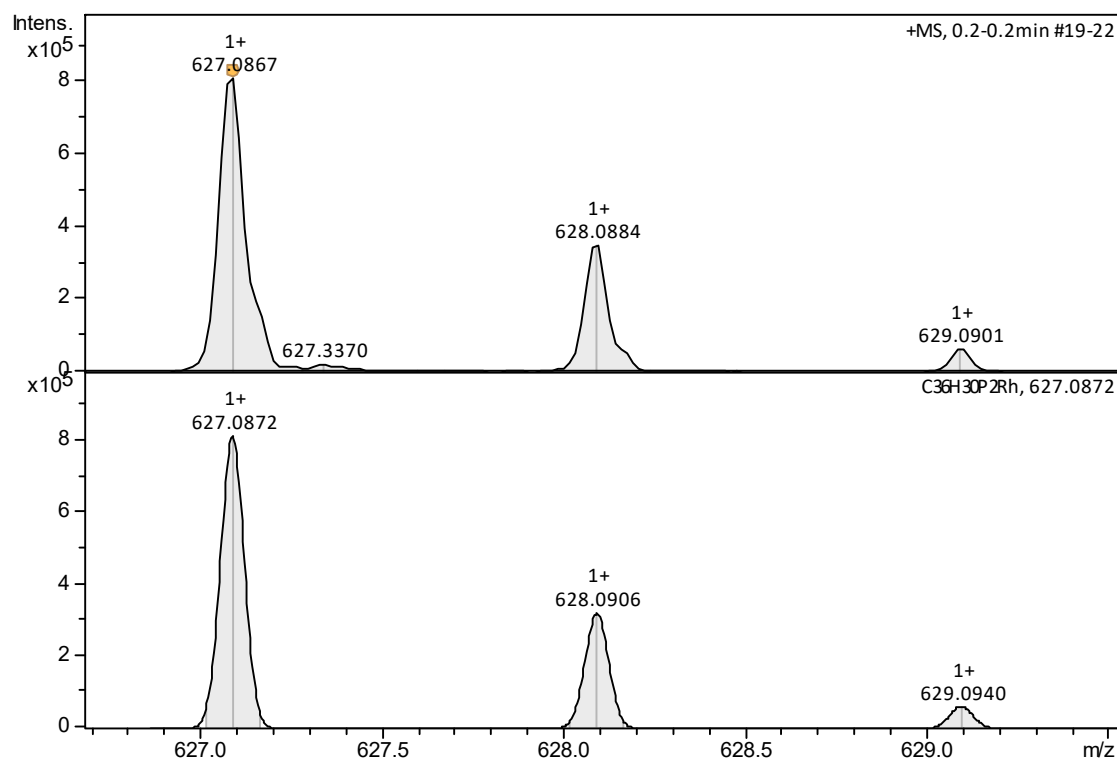

**Figure S19** Mass spectrum for 1: Experimental (upper); theoretical (bottom). The pattern corresponds to the  $[\text{Rh}(\text{PPh}_3)_2]^+$  ion.

**Calculation of free energy of activation by the coalescence temperature:**

$$\Delta G_A^\ddagger = 4.57 T_c (10.62 + \log (X/2\pi(1-\Delta P))) + \log (T_c/\delta\nu) = 17 \text{ kcal/mol}$$

$$\Delta G_B^\ddagger = 4.57 T_c (10.62 + \log (X/2\pi(1+\Delta P))) + \log (T_c/\delta\nu) = 16 \text{ kcal/mol}$$

$$T_c = 300 \text{ K}$$

$$\delta\nu \text{ (chemical shift difference between the two signals)} = 1.83 - (-1.09) \\ = 2.92$$

$$\Delta P \text{ (population site difference)} = 2/3 - 1/3 = 0.33$$

$$\log (X/2\pi(1-\Delta P)) = -0.15$$

$$\log (X/2\pi(1+\Delta P)) = -0.60$$

Based on the treatment by Shanan-Atidi and Bar-Eli (*J. Phy. Chem.* **1970**, 74, 961), and Egan and Mislow (Thesis Princeton University, 1971).

**Table S1. B3LYP/6-31+G(d,p) calculated Cartesian coordinates for PH<sub>3</sub>-ligated model compound [Rh(<sup>-2</sup>-B<sub>3</sub>H<sub>8</sub>(H)<sub>2</sub>(PH<sub>3</sub>)<sub>2</sub>)]**

| Atom | x           | y           | z           |
|------|-------------|-------------|-------------|
| Rh   | -0.15842700 | -0.45213800 | -0.00002700 |
| H    | -0.42290300 | -1.62051800 | 1.02066000  |
| H    | -0.42298400 | -1.62060500 | -1.02060100 |
| B    | 0.16110500  | 1.87046800  | 0.89370600  |
| B    | 0.16110100  | 1.87048400  | -0.89358600 |
| B    | 1.59839300  | 2.47927100  | -0.00000500 |
| H    | 0.16789500  | 0.70776700  | 1.42830700  |
| H    | 1.21233600  | 2.29083500  | 1.42346200  |
| H    | -0.73676200 | 2.52545300  | 1.33864800  |
| H    | 2.57618200  | 1.77816900  | 0.00036800  |
| H    | 1.78365500  | 3.66180700  | -0.00024200 |
| H    | 1.21265900  | 2.29030300  | -1.42328300 |
| H    | -0.73605900 | 2.52607400  | -1.33906900 |
| H    | 0.16765600  | 0.70784300  | -1.42835200 |
| P    | 2.04803900  | -1.17169500 | 0.00001500  |
| P    | -2.44782800 | -0.14076000 | 0.00002000  |
| H    | 2.88779900  | -0.81174700 | 1.07400700  |
| H    | 2.88775800  | -0.81210200 | -1.07413100 |
| H    | 2.27012600  | -2.56361500 | 0.00023600  |
| H    | -3.01783300 | 0.57225600  | 1.07501800  |
| H    | -3.01797900 | 0.57168800  | -1.07527800 |
| H    | -3.28852000 | -1.27167800 | 0.00036300  |
